# Supplementary material for: Research Initiative Supporting Excellence at the University of Cincinnati (RISE-UC): A Program to Develop and Support Research-Active Faculty Members
Source: PubMed Central journal article supplement — Acad Med. 2023 Sep 22;98(10):1120–30. doi: 10.1097/ACM.0000000000005270 (PMC10516163; doi:10.1097/acm.0000000000005270), 2023-09-22
Supplement: acm-98-1120-s001.pdf [file acm-98-1120-s001.pdf]

Supplemental digital content for Haworth KJ, Niederhausen KC, Smith EP, et al. Research Initiative Supporting Excellence at the University of Cincinnati (RISE-UC): A program to develop and support research-active faculty members. Acad Med.

## **Supplemental Digital Appendix 1**

**Number of Statistic Service Consultations Per Year  
From Fiscal Year (FY) 2018 Through FY 2021,  
Research Initiative Supporting Excellence at the  
University of Cincinnati, University of Cincinnati  
College of Medicine Department of Internal Medicine**

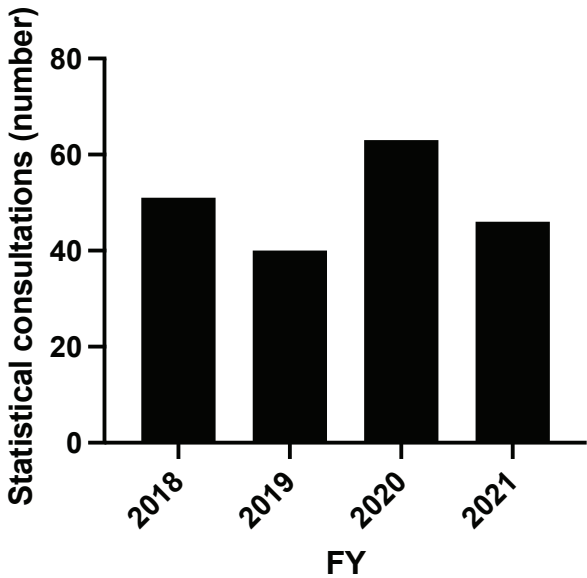

Supplemental digital content for Haworth KJ, Niederhausen KC, Smith EP, et al. Research Initiative Supporting Excellence at the University of Cincinnati (RISE-UC): A program to develop and support research-active faculty members. Acad Med.

## **Supplemental Digital Appendix 2**

### **Comparison of Research Support Services Identified by a Review of the Websites of Departments of Internal Medicine Ranked From 31 to 75 (Based on the 2021 Blue Ridge Institute for Medical Research Analysis of Total National Institutes of Health Funding Awarded), Research Initiative Supporting Excellence at the University of Cincinnati, University of Cincinnati College of Medicine Department of Internal Medicine**

Websites of departments of internal medicine ranked 31 to 75 were surveyed for research support mechanisms provided by the departments. Thirteen of forty-five (29%) had an organizational structure that was similar to the Academic Research Services and only five (11%) had an individual identified as a “grant writer.” Website data may undercount actual staffing and support provided by the surveyed departments.

**Departmental research websites  
listing services provided (%)**

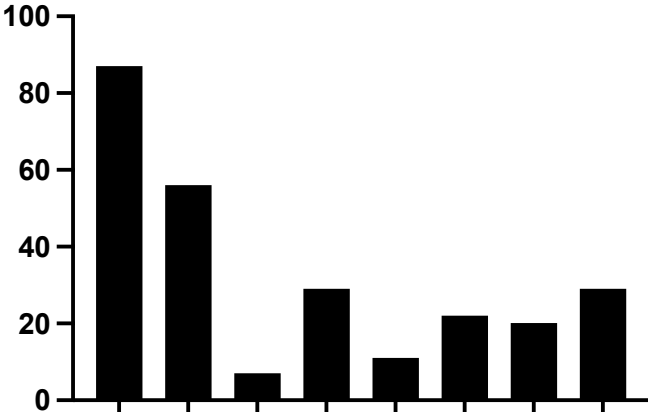

**Research Webpage**  
**External Links**  
**Templates**  
**ARS-like Service**  
**Grant Writer**  
**Internal Awards**  
**Annual Report**  
**Research Symposium**
